# Supplementary material for: Theoretical insights into the room temperature phosphorescence properties in star-shaped carbazole-based molecules
Source: Royal Society of Chemistry journal article supplement (doi:10.1039/d3nj01537h), 2023-01-01
Supplement: d3nj01537h1.pdf [file d3nj01537h1.pdf]

SUPPORTING INFORMATION for

**Theoretical Insights into the Room Temperature Phosphorescence  
Properties in Star-Shaped Carbazole Based Molecules**

Kothoori Naga Pranasree, Pandiyan Sivasakthi, and Pralok K. Samanta\*

Department of Chemistry, School of Science, Gandhi Institute of Technology and  
Management (GITAM), Hyderabad-502329, India

\*Corresponding author: psamanta@gitam.edu, pralok.samanta@gmail.com

**Table S1:** Calculation of low energy optical absorption energy with different DFT functionals. All values in eV.

| Molecules | Expt.       | B3LYP | PBE0 | BHandHLYP | $\omega$ B9XD | $\omega^*$ B97XD | m062x |
|-----------|-------------|-------|------|-----------|---------------|------------------|-------|
| CzO       | <b>3.71</b> | 3.43  | 3.56 | 4.26      | 4.23          | <b>3.71</b>      | 4.08  |
| CzS       | <b>3.70</b> | 3.28  | 3.41 | 4.16      | 4.12          | <b>3.57</b>      | 3.96  |
| CzSe      | <b>3.70</b> | 3.32  | 3.45 | 4.19      | 4.11          | <b>3.60</b>      | 3.98  |
| MAD       | <b>0</b>    | 0.36  | 0.23 | 0.50      | 0.45          | <b>0.07</b>      | 0.30  |

**Table S2:** Natures of Representative Ground State  $\lambda_{\text{abs}}$  ( $S_0 \rightarrow S_1$ ) with Different DFT Functionals (in eV).

| Molecules | Gaussian         | ORCA        |       |       |           |
|-----------|------------------|-------------|-------|-------|-----------|
|           | $\omega^*$ B97XD | PBE0        | B3LYP | M062X | BHandHLYP |
| CzO       | 3.71             | 3.59        | 3.45  | 4.10  | 4.30      |
| CzS       | 3.58             | 3.45        | 3.32  | 3.99  | 4.21      |
| CzSe      | 3.61             | 3.49        | 3.35  | 4.01  | 4.24      |
| MAD       | <b>0.00</b>      | <b>0.12</b> | 0.26  | 0.40  | 0.62      |

## Reorganization Energy:

Total reorganization energy ( $\lambda$ )

= intramolecular reorganization energy ( $\lambda_{\text{intra}}$ ) + contribution from surroundings ( $\lambda_{\text{surr}}$ )

= non-classical high-frequency intramolecular vibrational modes + low-frequency intramolecular vibrational modes + contribution from surroundings ( $\lambda_{\text{surr}}$ )

= non-classical high-frequency intramolecular vibrational modes + Marcus reorganization energy ( $\lambda_{\text{M}}$ )

=  $S_{\text{eff}} \times \hbar \omega_{\text{eff}} + \lambda_{\text{M}}$

**Table S3a\*:** Intramolecular Reorganization Energy and Calculation of  $k_{ISC}$  (in  $\text{s}^{-1}$ ) with different values of Huang-Rhys factor (S).

| Molecule | $\lambda_{\text{intra}}$<br>(eV) | $S_{1 \rightarrow T_n}$ | $k_{ISC} @ S=0$<br>$\lambda_{\text{M}}=0.3 \text{ eV}$ | $k_{ISC} @ S=1$<br>$\lambda_{\text{M}}=0.2 \text{ eV}$ | $k_{ISC} @ S=2$<br>$\lambda_{\text{M}}=0.1 \text{ eV}$ |
|----------|----------------------------------|-------------------------|--------------------------------------------------------|--------------------------------------------------------|--------------------------------------------------------|
| CzO      | 0.12                             | T <sub>1</sub>          | $1.08 \times 10^8$                                     | $1.05 \times 10^8$                                     | $9.33 \times 10^7$                                     |
|          |                                  | T <sub>3</sub>          | $7.75 \times 10^5$                                     | $9.22 \times 10^5$                                     | $1.44 \times 10^6$                                     |
| CzS      | 0.21                             | T <sub>1</sub>          | $1.76 \times 10^8$                                     | $9.92 \times 10^7$                                     | $1.23 \times 10^8$                                     |
|          |                                  | T <sub>2</sub>          | $2.90 \times 10^9$                                     | $3.30 \times 10^9$                                     | $5.14 \times 10^9$                                     |
| CzSe     | 0.17                             | T <sub>1</sub>          | $7.38 \times 10^9$                                     | $4.42 \times 10^9$                                     | $6.00 \times 10^9$                                     |
|          |                                  | T <sub>2</sub>          | $1.80 \times 10^{10}$                                  | $2.04 \times 10^{10}$                                  | $2.48 \times 10^{10}$                                  |
| CzOBr    | 0.07                             | T <sub>1</sub>          | $6.37 \times 10^8$                                     | $4.93 \times 10^8$                                     | $4.97 \times 10^8$                                     |
|          |                                  | T <sub>2</sub>          | $6.52 \times 10^8$                                     | $5.56 \times 10^8$                                     | $7.98 \times 10^8$                                     |
|          |                                  | T <sub>3</sub>          | $4.00 \times 10^7$                                     | $4.20 \times 10^7$                                     | $3.93 \times 10^7$                                     |
| CzSBr    | 0.08                             | T <sub>1</sub>          | $2.84 \times 10^{10}$                                  | $1.85 \times 10^9$                                     | $1.81 \times 10^9$                                     |
|          |                                  | T <sub>2</sub>          | $6.56 \times 10^6$                                     | $7.51 \times 10^6$                                     | $9.49 \times 10^6$                                     |

|        |      |                |                       |                       |                       |
|--------|------|----------------|-----------------------|-----------------------|-----------------------|
| CzSeBr | 0.08 | T <sub>1</sub> | 7.28×10 <sup>10</sup> | 4.75×10 <sup>10</sup> | 5.43×10 <sup>10</sup> |
|        |      | T <sub>2</sub> | 1.77×10 <sup>10</sup> | 4.52×10 <sup>10</sup> | 3.33×10 <sup>10</sup> |

\*Note: Only major contributing ISC channel are given here.

**Table S3b** Calculation of  $k_{ISC}$  (in s<sup>-1</sup>) with different values of Huang-Rhys factor (S).  $\lambda_M=0.3$  eV for CzX and  $\lambda_M=0.2$  eV CzXBr. X=O, S and Se.

| Molecule | S <sub>1</sub> →T <sub>n</sub> | $k_{ISC}@S=0$         | $k_{ISC}@S=1$         | $k_{ISC}@S=2$         |
|----------|--------------------------------|-----------------------|-----------------------|-----------------------|
| CzO      | T <sub>1</sub>                 | 1.08×10 <sup>8</sup>  | 7.38×10 <sup>7</sup>  | 3.97×10 <sup>7</sup>  |
|          | T <sub>3</sub>                 | 7.75×10 <sup>5</sup>  | 2.85×10 <sup>5</sup>  | 1.05×10 <sup>5</sup>  |
| CzS      | T <sub>1</sub>                 | 1.76×10 <sup>8</sup>  | 6.96×10 <sup>7</sup>  | 2.73×10 <sup>7</sup>  |
|          | T <sub>2</sub>                 | 2.90×10 <sup>9</sup>  | 1.07×10 <sup>9</sup>  | 3.93×10 <sup>8</sup>  |
| CzSe     | T <sub>1</sub>                 | 7.38×10 <sup>9</sup>  | 2.80×10 <sup>9</sup>  | 1.06×10 <sup>9</sup>  |
|          | T <sub>2</sub>                 | 1.80×10 <sup>10</sup> | 6.61×10 <sup>9</sup>  | 2.43×10 <sup>9</sup>  |
| CzOBr    | T <sub>1</sub>                 | 1.59×10 <sup>8</sup>  | 4.96×10 <sup>8</sup>  | 3.65×10 <sup>8</sup>  |
|          | T <sub>2</sub>                 | 1.45×10 <sup>9</sup>  | 5.67×10 <sup>8</sup>  | 2.22×10 <sup>8</sup>  |
|          | T <sub>3</sub>                 | 1.09×10 <sup>8</sup>  | 4.01×10 <sup>7</sup>  | 1.48×10 <sup>7</sup>  |
| CzSBr    | T <sub>1</sub>                 | 6.12×10 <sup>9</sup>  | 2.31×10 <sup>10</sup> | 1.74×10 <sup>10</sup> |
|          | T <sub>2</sub>                 | 2.06×10 <sup>7</sup>  | 7.60×10 <sup>6</sup>  | 2.80×10 <sup>6</sup>  |
| CzSeBr   | T <sub>1</sub>                 | 2.55×10 <sup>10</sup> | 4.75×10 <sup>10</sup> | 3.25×10 <sup>10</sup> |
|          | T <sub>2</sub>                 | 6.14×10 <sup>10</sup> | 2.28×10 <sup>10</sup> | 8.46×10 <sup>9</sup>  |

**Table S4:** HOMO, LUMO and energy gap ( $\Delta E_{HL}$ ) of all molecules in eV using  $\omega$ \*B97XD functional.

| Molecules | HOMO   | LUMO   | $\Delta E_{HL}$ |
|-----------|--------|--------|-----------------|
| CzO       | -6.576 | -0.275 | 6.301           |
| CzS       | -6.523 | -0.367 | 6.156           |
| CzSe      | -6.499 | -0.286 | 6.213           |
| CzOBr     | -6.911 | -0.757 | 6.154           |
| CzSBr     | -6.848 | -0.809 | 6.039           |
| CzSeBr    | -6.8   | -0.775 | 6.025           |

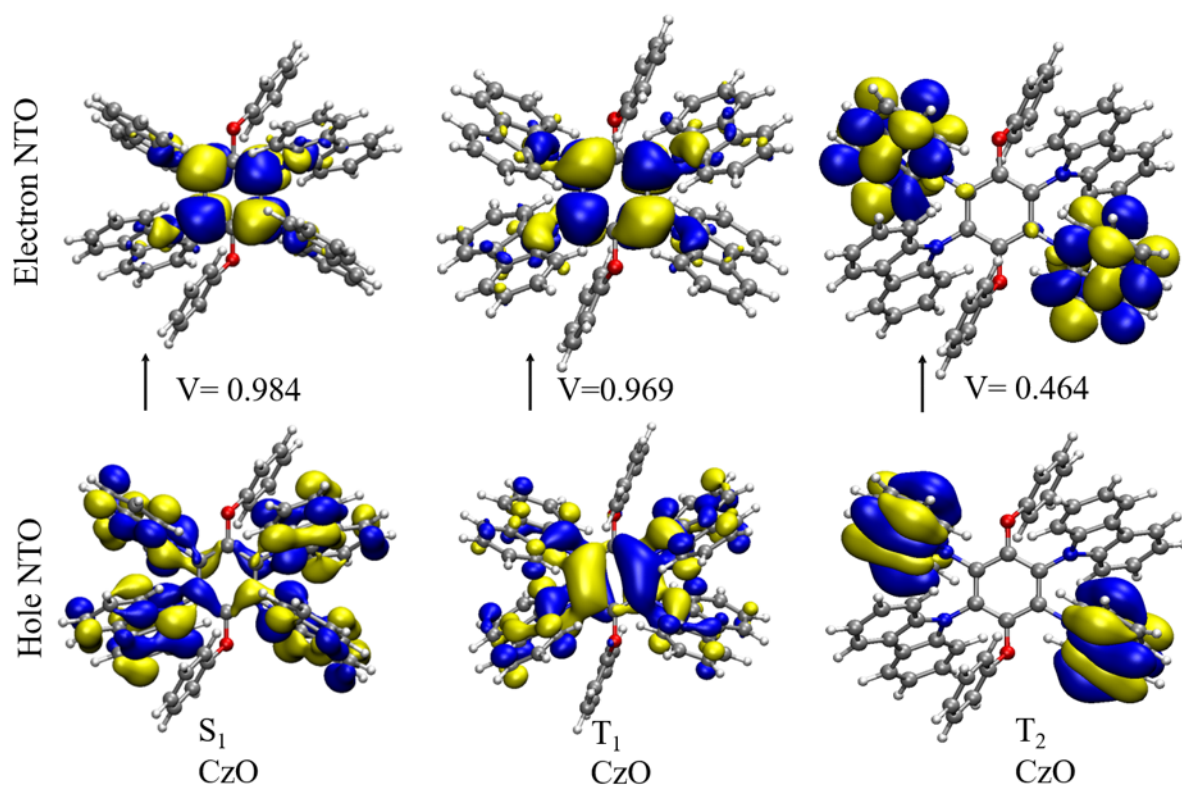

Electron NTO

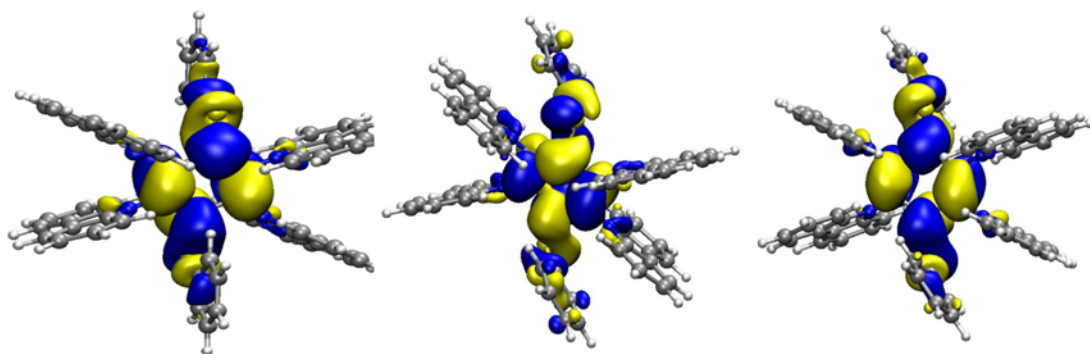

↑  $V=0.9991$

↑  $V=0.975$

↑  $V=0.993$

Hole NTO

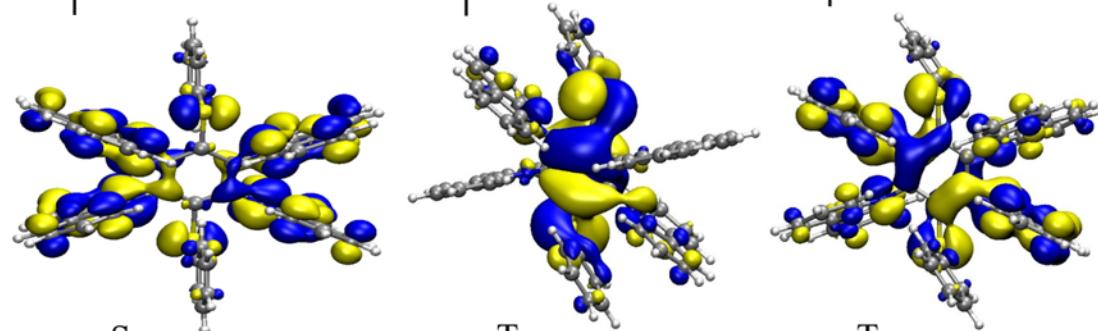

$S_1$   
CzS

$T_1$   
CzS

$T_2$   
CzS

Electron NTO

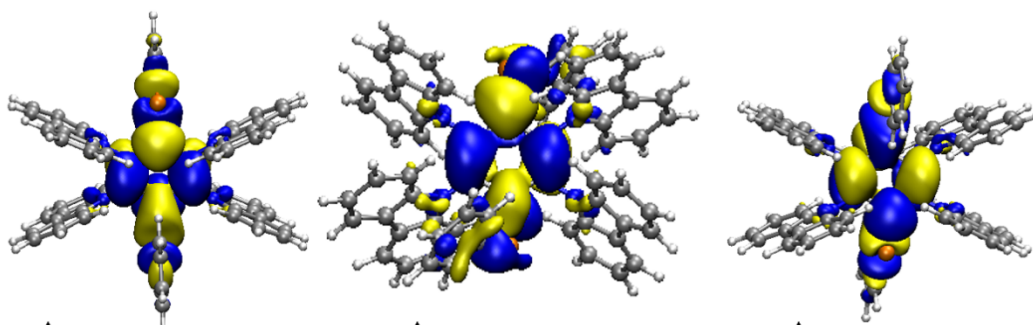

↑  $V=0.990$

↑  $V=0.974$

↑  $V=0.968$

Hole NTO

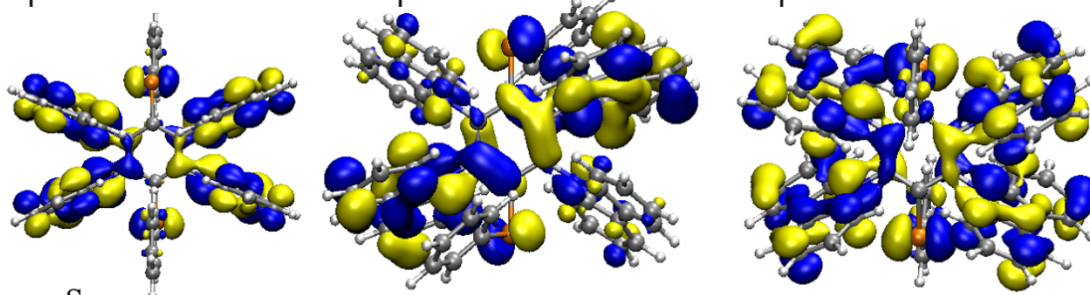

$S_1$   
CzSe

$T_1$   
CzSe

$T_2$   
CzSe

Electron NTO

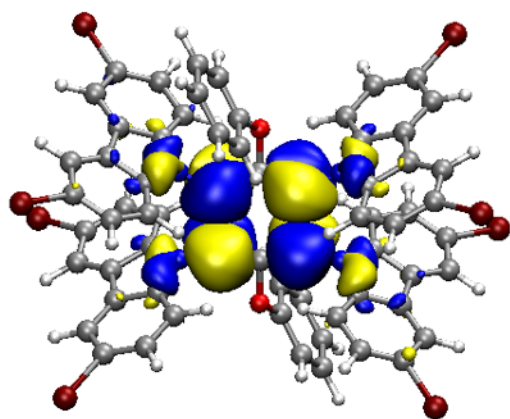

↑  $V = 0.985$

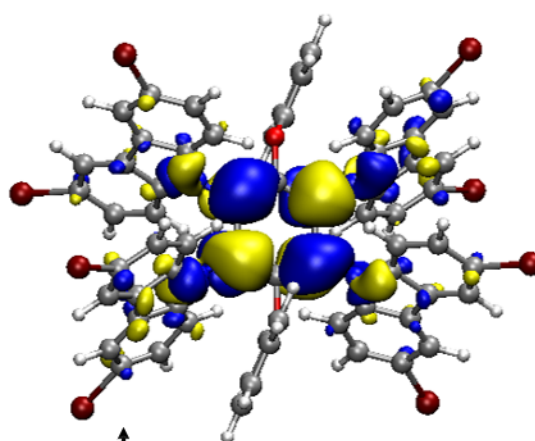

↑  $V = 0.968$

Hole NTO

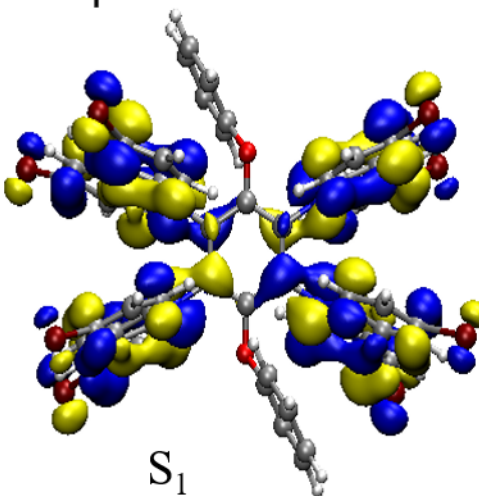

$S_1$   
CzOBr

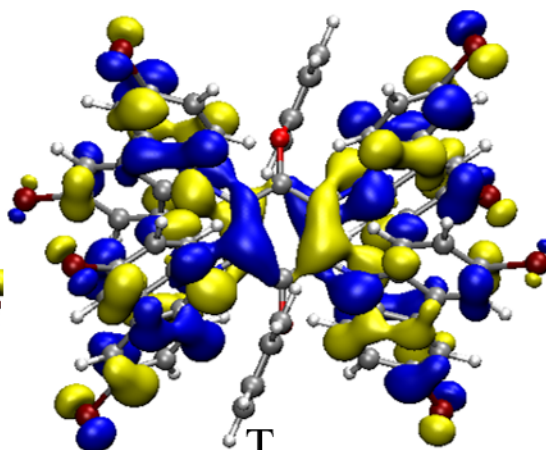

$T_1$   
CzOBr



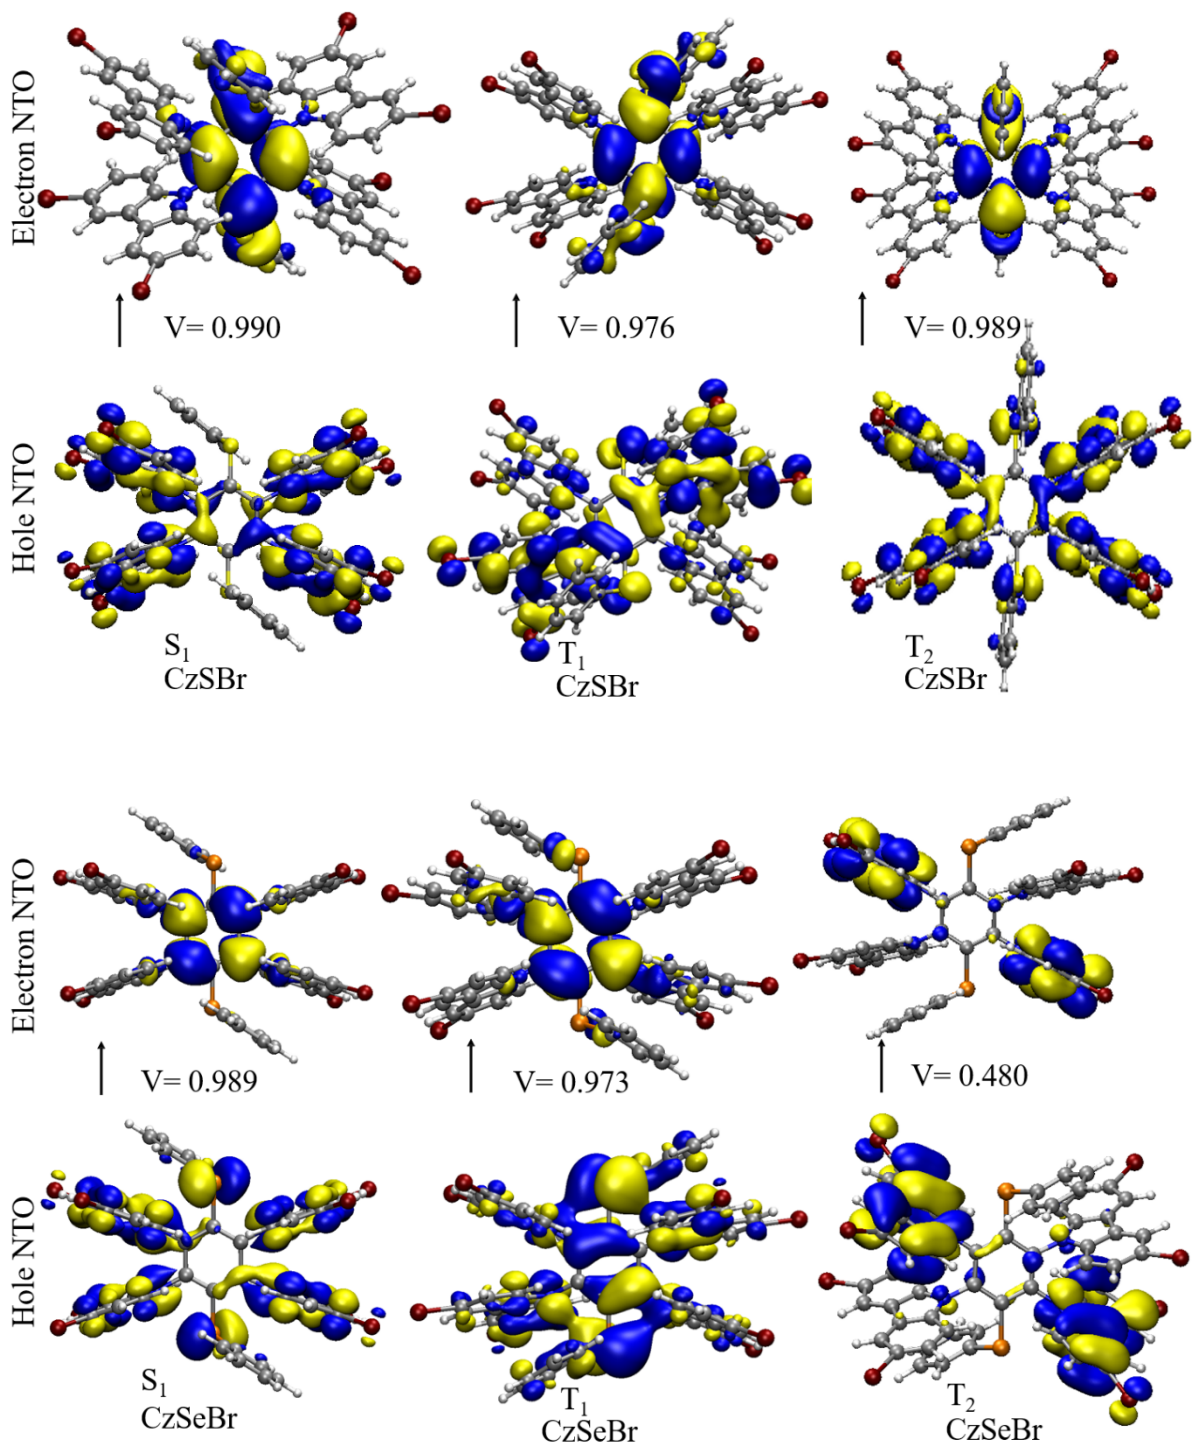

Fig. S1 NTO of singlet and triplet states.
